## LABORATORY INVESTIGATIONS

Anesthesiology  
83:535-542, 1995  
© 1995 American Society of Anesthesiologists, Inc.  
Lippincott-Raven Publishers

### **Effect of Fentanyl on the Minimum Alveolar Concentration of Isoflurane in Swine**

Paula F. Moon, D.V.M., Dipl.ACVA,\* Janet M. Scarlett, D.V.M., Ph.D.,† John W. Ludders, D.V.M., Dipl.ACVA,†  
Teresea A. Conway, B.S.,‡ Steven V. Lamb, B.S.§

**Background:** Fentanyl is used in anesthetic protocols for swine, but there are no reports on its potency in this species. This study measured the extent to which fentanyl reduces the minimum alveolar concentration of isoflurane ( $MAC_{ISO}$ ) in swine.

**Methods:** Sixteen swine were randomly assigned to four groups. For each group, baseline  $MAC_{ISO}$  was determined, and three groups received two of three fentanyl infusions as follows:  $50 \mu\text{g} \cdot \text{kg}^{-1} \cdot \text{h}^{-1}$  intravenously followed by  $100 \mu\text{g} \cdot \text{kg}^{-1} \cdot \text{h}^{-1}$ ,  $50 \mu\text{g} \cdot \text{kg}^{-1} \cdot \text{h}^{-1}$  followed by  $200 \mu\text{g} \cdot \text{kg}^{-1} \cdot \text{h}^{-1}$ , or  $100 \mu\text{g} \cdot \text{kg}^{-1} \cdot \text{h}^{-1}$  followed by  $200 \mu\text{g} \cdot \text{kg}^{-1} \cdot \text{h}^{-1}$  ( $n = 8$  for each dosage). A loading dose of fentanyl preceded each infusion. Each infusion was maintained for 60 min before initiating minimum alveolar concentration determination. The infusions were maintained throughout the period of minimum alveolar concentration determination. Plasma fentanyl samples were obtained after 30 min of each infusion, and plasma fentanyl and hemodynamic parameters were obtained immediately before stimulating swine for the final isoflurane concentration used in determining minimum alveolar concentration. A fourth group, control animals, received saline infusions. After

each infusion, the  $MAC_{ISO}$  was redetermined. Minimum alveolar concentration was determined using incremental changes in isoflurane concentrations until gross purposeful movement resulted when using a hemostat stimulus applied for 1 min to a rear dewclaw.

**Results:**  $MAC_{ISO}$  for controls was  $2.19 \pm 0.17\%$  (mean  $\pm$  SEM) and changed minimally over time ( $-0.13 \pm 4.77\%$ ).  $MAC_{ISO}$  decreased significantly ( $P \leq 0.01$ )  $24.5 \pm 3.2\%$ ,  $29.9 \pm 4.8\%$ , and  $45.9 \pm 5.5\%$  with fentanyl dosages of 50, 100, and 200  $\mu\text{g} \cdot \text{kg}^{-1} \cdot \text{h}^{-1}$ , respectively. Corresponding plasma fentanyl concentrations were  $14 \pm 1$  ng/ml,  $26 \pm 3$  ng/ml, and  $59 \pm 5$  ng/ml, respectively. A ceiling effect on reduction of  $MAC_{ISO}$  was not observed. Changes over time or between groups were not observed for arterial blood gas tensions, blood pressure, heart and respiratory rate, or body temperature.

**Conclusions:** These fentanyl dosages are larger than those commonly used in humans and other species. Anesthetic protocols using fentanyl for swine should be designed with the knowledge that a fentanyl infusion of  $200 \mu\text{g} \cdot \text{kg}^{-1} \cdot \text{h}^{-1}$  contributes approximately a 50%  $MAC_{ISO}$  equivalent. (Key words: Analgesics, opioid: fentanyl. Anesthetics, volatile: isoflurane. Animal: swine. Potency: minimum alveolar concentration.)

This article is accompanied by an editorial. Please see: Steffey EP: Isoflurane-sparing effect of fentanyl in swine: Relevance and importance. ANESTHESIOLOGY 83:446-448, 1995.

\* Assistant Professor, Department of Clinical Sciences.

† Associate Professor, Department of Clinical Sciences.

‡ Research Technician, Department of Clinical Sciences.

§ Research Associate, Diagnostic Laboratory.

Received from the Department of Clinical Sciences and Diagnostic Laboratory, College of Veterinary Medicine, Cornell University, Ithaca, New York. Submitted for publication October 24, 1994. Accepted for publication April 5, 1995. Supported in part by a grant from the Cornell Alumni Unrestricted Funds and a grant from the President's Council for Cornell Women. Coat-a-Count fentanyl assay kits were donated by Diagnostics Products Corporation. Presented at the Fifth International Veterinary Anesthesia Conference, Guelph, Canada, August 1994.

Address reprint requests to Dr. Moon: Department of Clinical Sciences, College of Veterinary Medicine, Cornell University, Ithaca, New York 14850.

SWINE have been adopted as a common model for cardiovascular<sup>1-10</sup> and transplantation<sup>11-14</sup> research because of the physiologic and anatomic similarities of swine to humans. In these studies, fentanyl was administered intravenously in dosages ranging from 4 to  $50 \mu\text{g} \cdot \text{kg}^{-1} \cdot \text{h}^{-1}$  as part of the anesthetic protocol.<sup>12</sup> These dosages, however, appear to be extrapolated from dosages used in humans and are not based on pharmacologic data for swine. These dosages are "derived from other laboratories"<sup>1</sup> or from "methods for cardiac surgery in man [because] the veterinary anesthesia literature is based primarily on agricultural procedures and is not relevant [to cardiovascular research]."<sup>1</sup> However, it is reasonable to question whether a particular anesthetic protocol used in one species should be transferred directly to another, especially in view of the fact that the resulting data can be significantly influenced by neurohumoral responses to pain.

Studies have shown that there are interspecies differences in pharmacokinetic and pharmacodynamic properties of opioid agonists.<sup>15-20</sup> A single bolus of fentanyl, at dosages of 30-50  $\mu\text{g}/\text{kg}$  for infants and 20-100  $\mu\text{g}/\text{kg}$  for adults, has been administered as the sole anesthetic for humans with cardiovascular disease.<sup>17</sup> However, the anesthetic efficacy of a single bolus of fentanyl, as large as 3,000  $\mu\text{g}/\text{kg}$ , to dogs has been debated.<sup>16</sup> More specifically, swine require larger concentrations of morphine than either dogs or primates,<sup>15</sup> and primates respond to fentanyl in a manner similar to humans.<sup>18</sup> Because both morphine and fentanyl are opioid agonists, fentanyl dosages acceptable for humans may be inadequate for swine used in research protocols.

To date, there are no reports on the efficacy of fentanyl as an anesthetic in swine. Numerous investigations have measured the anesthetic potency of opioid agonists in various species by performing minimum alveolar concentration reduction studies.<sup>21,22</sup> The goal of this study was to measure the extent to which fentanyl reduced the minimum alveolar concentration of isoflurane ( $\text{MAC}_{\text{ISO}}$ ) in swine.

### Methods and Materials

This study was approved by the Cornell University Animal Care and Use Committee. Unpremedicated, 4-5-month-old, female Yorkshire-cross swine ( $n = 16$ ), weighing  $27 \pm 2.2$  kg (mean  $\pm$  SD), were anesthetized *via* mask with 4-5% isoflurane (Aerrane, Anaquest, Madison, WI) in 100%  $\text{O}_2$  delivered at 5 l/min. Each pig was orotracheally intubated, and the concentration of isoflurane was reduced to 2-3% in oxygen delivered at 2 l/min. Animals were placed in lateral recumbency. Atropine (0.04 mg/kg, intramuscular) was administered to decrease secretions and protect against fentanyl-induced bradycardia. The lungs were mechanically ventilated to maintain normocapnia ( $\text{Pa}_{\text{CO}_2}$  35-45 mmHg). Two catheters were inserted percutaneously into auricular veins, one for administering fluids and the other for infusing fentanyl or saline. A catheter was inserted percutaneously into a femoral artery for continuous monitoring of systemic arterial blood pressures and for obtaining arterial blood samples. A lead II electrocardiogram was used to monitor heart rate and rhythm, and an agent-specific, photoacoustic gas monitor (Type 1304, Brüel and Kjaer, Naerum, Denmark) measured inspired and expired gases,

including end-tidal isoflurane and carbon dioxide. Lactated Ringer's solution was infused intravenously throughout the study to maintain a systemic mean arterial blood pressure greater than 60 mmHg. A rectal temperature probe monitored body temperature, which was maintained at 38-39°C by using a warm water-circulating heating pad to warm the swine or a fan and isopropyl alcohol to cool the swine.

Using a random number table, 16 swine were divided equally into four groups. Three of these groups were randomly assigned to one of three different protocols. Each protocol consisted of two fentanyl infusions as follows: 50  $\mu\text{g} \cdot \text{kg}^{-1} \cdot \text{h}^{-1}$  followed by 100  $\mu\text{g} \cdot \text{kg}^{-1} \cdot \text{h}^{-1}$ , 50  $\mu\text{g} \cdot \text{kg}^{-1} \cdot \text{h}^{-1}$  followed by 200  $\mu\text{g} \cdot \text{kg}^{-1} \cdot \text{h}^{-1}$ , or 100  $\mu\text{g} \cdot \text{kg}^{-1} \cdot \text{h}^{-1}$  followed by 200  $\mu\text{g} \cdot \text{kg}^{-1} \cdot \text{h}^{-1}$ . Thus, eight swine received each dosage. Before each infusion, a loading dose of fentanyl was administered, as described below. The fourth group, the control group, received infusions of normal saline to evaluate the effect of time on  $\text{MAC}_{\text{ISO}}$ .

For each group, baseline  $\text{MAC}_{\text{ISO}}$  was determined before the pigs received fentanyl. The first infusion was administered for 60 min, after which  $\text{MAC}_{\text{ISO}}$  was redetermined. After  $\text{MAC}_{\text{ISO}}$  was redetermined, the second 60-min infusion was administered, and  $\text{MAC}_{\text{ISO}}$  was determined again.

Fentanyl was administered as fentanyl citrate (Sigma, St. Louis, MO) dissolved in 0.9% normal saline. A loading dose for each maintenance infusion rate was determined using standard pharmacokinetic equations, where loading dose =  $V_D \cdot C_p$  and maintenance infusion rate =  $\text{CL} \cdot C_p$ ;  $V_D$  = volume of distribution,  $C_p$  = plasma fentanyl concentration, and  $\text{CL}$  = clearance of fentanyl.  $V_D$  and  $\text{CL}$  were set at 216 ml/kg and 2.42  $\text{ml} \cdot \text{kg}^{-1} \cdot \text{min}^{-1}$ , respectively, based on previously reported pharmacokinetic data of fentanyl in swine.<sup>20</sup> The initial loading dose was calculated for the appropriate maintenance infusion rate using these data, whereas the second loading dose and maintenance infusion rate were corrected for the theoretical plasma fentanyl concentration already present because of the first fentanyl infusion (see table 1 for specific loading doses for each group). To blind the investigators to the type (saline *vs.* fentanyl) and dosage of solution being infused, loading doses for the first and second infusions were standardized to 60-ml volumes, and both infusion volumes were standardized for administering the test solution at 100 ml/h. For each infusion, plasma fentanyl samples were obtained after 30 min and when  $\text{MAC}_{\text{ISO}}$  was determined to ascertain whether blood fentanyl concentrations were at steady-state.

At the beginning and end of the study,  $\text{MAC}_{\text{ISO}}$  was determined by obtaining for measuring  $\text{MAC}_{\text{ISO}}$ . During baseline  $\text{MAC}_{\text{ISO}}$ , each pig received Ringer's solution. During the test solution and lactated Ringer's solution, the lactated Ringer's solution and lactated Ringer's solution were administered concurrently, the lactated Ringer's solution pressure.

The method used for determining  $\text{MAC}_{\text{ISO}}$  is described previously.<sup>23,24</sup> The minimum alveolar concentration was maintained at a level such that the difference between the expired concentration of isoflurane and the inspired concentration of isoflurane was 0.1%. This was done to ensure that the end-tidal concentration of alveolar isoflurane was 0.1% above the inspired concentration. At the end of each 5-min test period, tidal gases, heart and respiratory requirements, and fluid requirements were recorded. Each pig was stimulated with a full ratchet lock on the rear of the head to move cranially and caudally. A hemostat. If there was no response to stimulation, the end-tidal isoflurane concentration was reduced 10-20%, 15 min was allowed to elapse, and the stimulus was repeated. The end-tidal isoflurane concentration was reduced until there was purposeful movement. The end-tidal isoflurane concentration was increased during the equilibration period, the stimulus was repeated until the  $\text{MAC}_{\text{ISO}}$  for that pig. The end-tidal carbon dioxide concentration was maintained at 35-45 mmHg. Blood gas samples were obtained within 30 minutes of sampling. A gas analyzer (ABL 5, Radiometer, Copenhagen, Denmark). Results were corrected for hematocrits were determined in a microhematocrit centrifuge. Hematocrits were determined with a microhematocrit centrifuge. It is clinically thought to be a refractometer does not measure protein and small amounts of protein alter the reflectance of a solution samples from the refractometer were stored at -30°C until analysis using a solid-phase



## MAC-SPARING EFFECTS OF FENTANYL IN SWINE

At the beginning and end of the study, blood was obtained for measuring hematocrit and total solids. During baseline  $MAC_{ISO}$ , each pig received only lactated Ringer's solution. During the first and second infusions, the test solution and lactated Ringer's were administered concurrently, the latter for maintaining blood pressure.

The method used for determining  $MAC_{ISO}$  has been described previously.<sup>23,24</sup> Briefly, an end-tidal isoflurane concentration was maintained for a minimum of 15 min such that the difference between the inspired and expired concentration of isoflurane was no more than 0.1%. This was done to ensure steady-state equilibration of alveolar isoflurane with that in arterial blood (brain). At the end of each 15-min equilibration period, end-tidal gases, heart and respiratory rates, blood pressures, fluid requirements, and temperatures were recorded. Each pig was stimulated with a hemostat clamped to full ratchet lock on a rear dewclaw, and the limb was moved cranially and caudally for a minute using the hemostat. If there was no purposeful response to stimulation, the end-tidal isoflurane concentration was reduced 10–20%, 15 min was allowed for equilibration, and the stimulus was repeated. Additional decrements of the end-tidal isoflurane concentration were made until there was purposeful movement. The isoflurane concentration was increased 10%, and after the equilibration period, the stimulus was repeated. The isoflurane concentration halfway between that allowing and that preventing movement, to the nearest 0.05%, was the  $MAC_{ISO}$  for that pig. Once  $MAC_{ISO}$  was determined, end-tidal carbon dioxide was recorded, and an arterial blood sample was simultaneously collected for analysis of plasma fentanyl, pH, and blood gas tensions. All animals were allowed to recover from anesthesia.

Blood gas samples were stored on ice and analyzed within 30 minutes of sampling on an automated blood gas analyzer (ABL2, Radiometer, Copenhagen, Denmark). Results were corrected for body temperature. Hematocrits were determined by centrifugation of blood in a microhematocrit centrifuge, and total solids were determined with a refractometer. Total solids is clinically thought to be equivalent to total protein, but a refractometer does not distinguish between total protein and small amounts of other particles, which may alter the reflectance of a solution. Plasma samples and solution samples from the first and second infusions were stored at  $-30^{\circ}$  until assayed for fentanyl concentration using a solid-phase radioimmunoassay kit (Coat-

**Table 1. Loading Doses of Fentanyl Each Animal Received before Each Infusion for the Three Experimental Groups**

| Group | Loading Dose ( $\mu\text{g}/\text{kg}$ ) |                 |
|-------|------------------------------------------|-----------------|
|       | First Infusion                           | Second Infusion |
| 1     | 74.4                                     | 74.4            |
| 2     | 74.4                                     | 223             |
| 3     | 148.8                                    | 148.8           |

Loading doses were calculated from the pharmacokinetic data in reference 20 for the first infusion as well as the theoretical plasma fentanyl present for the second infusion. Group 1 received  $50 \mu\text{g} \cdot \text{kg}^{-1} \cdot \text{h}^{-1}$  followed by  $100 \mu\text{g} \cdot \text{kg}^{-1} \cdot \text{h}^{-1}$ . Group 2 received  $50 \mu\text{g} \cdot \text{kg}^{-1} \cdot \text{h}^{-1}$  followed by  $200 \mu\text{g} \cdot \text{kg}^{-1} \cdot \text{h}^{-1}$ . Group 3 received  $100 \mu\text{g} \cdot \text{kg}^{-1} \cdot \text{h}^{-1}$  followed by  $200 \mu\text{g} \cdot \text{kg}^{-1} \cdot \text{h}^{-1}$ .  $n = 4$  for each group.

A-Count fentanyl, Diagnostic Product, Los Angeles, CA). These assays measure fentanyl base, which is 64% of the weighed fentanyl citrate used in the infusions. All samples were compared with results obtained from a second commercial radioimmunoassay kit (Research Diagnostics, Flanders, NJ). In addition, samples from the stock fentanyl solution, from commercially available medical fentanyl citrate (fentanyl citrate injection, Abbott, Abbott Park, IL), from both assay kit standards, and from randomly selected experimental plasma samples were assayed for fentanyl by infusion atmospheric pressure ionization mass spectrometry. This was done to verify that the stock chemical compound had equal fentanyl activity as the commercially available compound, and that both kits were accurate in measuring fentanyl.

This study was designed as an incomplete block design. The mean percent reductions in  $MAC_{ISO}$  and the absolute changes in  $MAC_{ISO}$  from baseline associated with each fentanyl dosage ( $50$ ,  $100$ , and  $200 \mu\text{g} \cdot \text{kg}^{-1} \cdot \text{h}^{-1}$ ) were compared using analysis of variance for incomplete block designs.<sup>25</sup> The analysis was carried out using the general linear models procedure in SAS.<sup>26</sup> Statistical significance was conservatively set at  $P \leq 0.01$  to adjust for multiple comparisons.<sup>27</sup> Because there was some concern that the order of treatments might influence the results, mean percent reduction in  $MAC_{ISO}$  was compared within treatment groups, where data existed, using Student's  $t$  test.<sup>28</sup> The association between the  $MAC_{ISO}$  and plasma fentanyl concentration in each pig was assessed with Pearson's correlation coefficient and simple linear regression.<sup>28</sup>

Measurements of potentially confounding factors (temperature, pH,  $Pa_{O_2}$ , or  $Pa_{CO_2}$ ) were compared

across the treatment groups (*i.e.*, fentanyl dosages) using analysis of variance. Tukey's method for multiple comparisons was used to evaluate pairwise comparisons.<sup>25</sup> Comparisons of continuous variables between two groups were compared with the Student's *t* test (when the groups were independent) and with the paired *t* test (when the data were dependent).

## Results

Results are expressed as mean  $\pm$  SEM. Variables known to affect minimum alveolar concentration (temperature, pH, PaO<sub>2</sub>, or PaCO<sub>2</sub>) were unchanged and within normal limits throughout the study (table 2). Each animal received  $15 \pm 1$  ml  $\cdot$  kg<sup>-1</sup>  $\cdot$  h<sup>-1</sup> of fluids during the  $5.3 \pm 0.3$ -h study. Although not statistically significant, blood pressure tended to increase as fentanyl dosages increased among the groups (table 2). Within treatment type, there was no significant difference in the percent reduction in MAC<sub>ISO</sub> among pigs receiving 100  $\mu$ g  $\cdot$  kg<sup>-1</sup>  $\cdot$  h<sup>-1</sup> fentanyl as the first treatment and those receiving this dose preceded by 50  $\mu$ g  $\cdot$  kg<sup>-1</sup>  $\cdot$  h<sup>-1</sup>. Similarly, there was no difference between pigs receiving 200  $\mu$ g  $\cdot$  kg<sup>-1</sup>  $\cdot$  h<sup>-1</sup> preceded by 50  $\mu$ g  $\cdot$  kg<sup>-1</sup>  $\cdot$  h<sup>-1</sup> compared to those receiving this dose preceded by 100  $\mu$ g  $\cdot$  kg<sup>-1</sup>  $\cdot$  h<sup>-1</sup>. All groups had obtained a steady-state level of plasma fentanyl as evidenced by comparing middle- and end-of-infusion plasma fentanyl concentrations (table 3).

Previous research has indicated that minimum alveolar concentration does not vary over time.<sup>23</sup> Data from the control group (no fentanyl) confirmed this, and these data were not included in further comparisons in the effectiveness of different fentanyl infusion dosages. There was, however, wide variation in the value

of MAC<sub>ISO</sub> among these four animals (fig. 1), and one of these had an unexplained 28% decrease in MAC<sub>ISO</sub> during the second infusion. Despite this individual variation, MAC<sub>ISO</sub> did not change statistically throughout the study for these four animals.

Mean plasma fentanyl concentrations and all MAC<sub>ISO</sub> data are provided in table 3. The baseline MAC<sub>ISO</sub> was not different between groups or compared to controls. There was a dose-related decrease in MAC<sub>ISO</sub> as the dose of fentanyl increased (fig. 2). The MAC<sub>ISO</sub> at each dosage of fentanyl was statistically different from the other two dosages. Among individual animals, the percent reduction in MAC<sub>ISO</sub> for swine receiving 50  $\mu$ g  $\cdot$  kg<sup>-1</sup>  $\cdot$  h<sup>-1</sup> ranged from 10% to 37%; for those receiving 100  $\mu$ g  $\cdot$  kg<sup>-1</sup>  $\cdot$  h<sup>-1</sup>, the reduction in MAC<sub>ISO</sub> ranged from 11% to 48%; and for 200  $\mu$ g  $\cdot$  kg<sup>-1</sup>  $\cdot$  h<sup>-1</sup>, it ranged from 25% to 63%.

There was a statistically significant ( $P \leq 0.01$ ) negative correlation when MAC<sub>ISO</sub> ( $r = -0.59$ ; fig. 3) was plotted against the plasma fentanyl level for each animal. One animal with a blood fentanyl concentration of 89 ng/ml had a relatively large MAC<sub>ISO</sub> and might be considered to be an outlier. This animal received 100  $\mu$ g  $\cdot$  kg<sup>-1</sup>  $\cdot$  h<sup>-1</sup> fentanyl followed by 200  $\mu$ g  $\cdot$  kg<sup>-1</sup>  $\cdot$  h<sup>-1</sup> and had high MAC<sub>ISO</sub> values for baseline and both infusions (2.68%, 2.20%, and 2.00%, respectively). When all three MAC<sub>ISO</sub> determinations from this pig are removed, the MAC<sub>ISO</sub> versus plasma fentanyl becomes even more highly correlated ( $r = -0.74$ ).

## Discussion

Fentanyl is often used in anesthetic protocols for research animals, particularly swine. Prior studies using fentanyl in swine, however, did not focus on its anes-

Table 2. Blood Gas and Hemodynamic Data from Swine Receiving Several Infusions of Fentanyl

| Dosage*<br>( $\mu$ g $\cdot$ kg <sup>-1</sup> $\cdot$ h <sup>-1</sup> ) | pH <sub>a</sub>   | PaCO <sub>2</sub><br>(mmHg) | PaO <sub>2</sub><br>(mmHg) | ABE<br>(mEq/L) | HCT (%)    | TS (g/dl)     | ETCO <sub>2</sub><br>(mmHg) | HR<br>(beats/min) | MAP<br>(mmHg) | Temperature<br>(°C) |
|-------------------------------------------------------------------------|-------------------|-----------------------------|----------------------------|----------------|------------|---------------|-----------------------------|-------------------|---------------|---------------------|
| 0                                                                       | 7.422 $\pm$ 0.005 | 42 $\pm$ 1                  | 407 $\pm$ 19               | 2.2 $\pm$ 0.4  | 30 $\pm$ 1 | 5.7 $\pm$ 0.1 | 39 $\pm$ 1                  | 113 $\pm$ 3       | 56 $\pm$ 2    | 38.7 $\pm$ 0.0      |
| 50                                                                      | 7.354 $\pm$ 0.017 | 45 $\pm$ 2                  | 376 $\pm$ 22               | -0.7 $\pm$ 0.4 | ND         | ND            | 43 $\pm$ 2                  | 133 $\pm$ 5       | 60 $\pm$ 1    | 39.0 $\pm$ 1        |
| 100                                                                     | 7.373 $\pm$ 0.021 | 45 $\pm$ 2                  | 380 $\pm$ 23               | 0.2 $\pm$ 0.7  | 30 $\pm$ 2 | 5.3 $\pm$ 0.2 | 42 $\pm$ 1.3                | 135 $\pm$ 6       | 62 $\pm$ 3    | 38.8 $\pm$ 0.0      |
| 200                                                                     | 7.402 $\pm$ 0.015 | 42 $\pm$ 2                  | 413 $\pm$ 28               | 0.7 $\pm$ 0.4  | 28 $\pm$ 1 | 5.0 $\pm$ 0.2 | 39 $\pm$ 1                  | 131 $\pm$ 8       | 68 $\pm$ 4    | 38.9 $\pm$ 0.1      |

Values are mean  $\pm$  SEM.

ABE = arterial base excess; ETCO<sub>2</sub> = end-tidal CO<sub>2</sub>; HCT = hematocrit; HR = heart rate; MAP = mean arterial pressure; ND = no data; PaCO<sub>2</sub> = arterial partial pressure of carbon dioxide; PaO<sub>2</sub> = arterial partial pressure of oxygen; pH<sub>a</sub> = arterial pH; TS = total solids.

\* Baseline data are for n = 12, fentanyl dosages are for n = 8.

Table 3. Plasma Fentanyl Concentration from Baseline MAC<sub>ISO</sub> after Fentanyl Infusion

| Fentanyl Infusion<br>( $\mu$ g $\cdot$ kg <sup>-1</sup> $\cdot$ h <sup>-1</sup> ) | 30-min<br>Fentanyl<br>( $\mu$ g $\cdot$ kg <sup>-1</sup> $\cdot$ h <sup>-1</sup> ) |
|-----------------------------------------------------------------------------------|------------------------------------------------------------------------------------|
| 50                                                                                | 14 $\pm$ 1                                                                         |
| 100                                                                               | 26 $\pm$ 3                                                                         |
| 200                                                                               | 55 $\pm$ 3                                                                         |

Values are mean  $\pm$  SEM; n = 8 swine.

MAC<sub>ISO</sub> = minimum alveolar concentration.

\* Mean values are significantly different from 200  $\mu$ g  $\cdot$  kg<sup>-1</sup>  $\cdot$  h<sup>-1</sup> versus 50  $\mu$ g  $\cdot$  kg<sup>-1</sup>  $\cdot$  h<sup>-1</sup> and 100  $\mu$ g  $\cdot$  kg<sup>-1</sup>  $\cdot$  h<sup>-1</sup>.

thetic efficacy.<sup>1,3-14</sup> Inform  
not useful because nestl  
vided<sup>9,13</sup> or neuromuscula  
Neuromuscular blockade  
difficult to determine, esp  
variables and other monito  
manipulated, and anther  
this study was to measure  
reduced the MAC<sub>ISO</sub> in s  
mation on its potency in  
tanyl infusion used in this  
fentanyl infusion reported

In this study, the mean  
2.19%, was similar to pre  
2.2%<sup>24</sup> for swine. There v

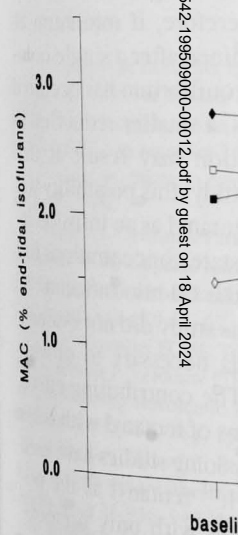

Fig. 1. The MAC<sub>ISO</sub> for control and after two 60-min infusions

## MAC-SPARING EFFECTS OF FENTANYL IN SWINE

**Table 3. Plasma Fentanyl Concentrations, Baseline MAC<sub>ISO</sub>, MAC<sub>ISO</sub> after 60-minute Fentanyl Infusion, and Percent Reduction from Baseline MAC<sub>ISO</sub> after Fentanyl Infusion in Swine**

| Fentanyl Infusion ( $\mu\text{g} \cdot \text{kg}^{-1} \cdot \text{h}^{-1}$ ) | 30-min Plasma Fentanyl (ng/ml) | Final Plasma Fentanyl (ng/ml) | Baseline MAC <sub>ISO</sub> (%) | MAC <sub>ISO</sub> (%) after Infusion | % Reduction from Baseline in MAC <sub>ISO</sub> |
|------------------------------------------------------------------------------|--------------------------------|-------------------------------|---------------------------------|---------------------------------------|-------------------------------------------------|
| 50                                                                           | 14 ± 1                         | 14 ± 1                        | 2.51 ± 0.08                     | 1.89 ± 0.09                           | 25 ± 3*                                         |
| 100                                                                          | 26 ± 3                         | 26 ± 3                        | 2.40 ± 0.13                     | 1.65 ± 0.09                           | 30 ± 5*                                         |
| 200                                                                          | 55 ± 3                         | 59 ± 5                        | 2.50 ± 0.12                     | 1.35 ± 0.11                           | 46 ± 6*                                         |

Values are mean ± SEM; n = 8 swine per infusion.

MAC<sub>ISO</sub> = minimum alveolar concentration of isoflurane.

\* Mean values are significantly different: 50  $\mu\text{g} \cdot \text{kg}^{-1} \cdot \text{h}^{-1}$  versus 100  $\mu\text{g} \cdot \text{kg}^{-1} \cdot \text{h}^{-1}$  ( $P = 0.002$ ); 50  $\mu\text{g} \cdot \text{kg}^{-1} \cdot \text{h}^{-1}$  versus 200  $\mu\text{g} \cdot \text{kg}^{-1} \cdot \text{h}^{-1}$  ( $P = 0.0001$ ); 100  $\mu\text{g} \cdot \text{kg}^{-1} \cdot \text{h}^{-1}$  versus 200  $\mu\text{g} \cdot \text{kg}^{-1} \cdot \text{h}^{-1}$  ( $P = 0.004$ ).

thetic efficacy.<sup>1,3-14</sup> Information from these studies is not useful because anesthetic dosages were not provided<sup>9,13</sup> or neuromuscular blockers were used.<sup>1-9,11-14</sup>

Neuromuscular blockade makes depth of anesthesia difficult to determine, especially when hemodynamic variables and other monitored signs are experimentally manipulated, and are therefore unreliable. The goal of this study was to measure the extent to which fentanyl reduced the MAC<sub>ISO</sub> in swine, thus providing information on its potency in this species. The lowest fentanyl infusion used in this study was based on the largest fentanyl infusion reported for swine.<sup>1</sup>

In this study, the mean control value for MAC<sub>ISO</sub>, 2.19%, was similar to previous reports of 2.04%<sup>29</sup> and 2.2%<sup>24</sup> for swine. There was a decrease in MAC<sub>ISO</sub> with

increasing concentrations of plasma fentanyl. The lowest infusion rate, 50  $\mu\text{g} \cdot \text{kg}^{-1} \cdot \text{h}^{-1}$ , produced a 24% decrease in MAC<sub>ISO</sub>, whereas the largest infusion rate, 200  $\mu\text{g} \cdot \text{kg}^{-1} \cdot \text{h}^{-1}$ , produced only a 45% reduction in MAC<sub>ISO</sub>. In a similar study in humans, investigators reported that plasma fentanyl concentrations as little as 3 ng/ml resulted in a 63% decrease in MAC<sub>ISO</sub>.<sup>22</sup> In this pig study, plasma fentanyl concentrations of 59 ng/ml, 20 times greater than in humans, resulted in only a 45% decrease in MAC<sub>ISO</sub>. In dogs, plasma fentanyl concentrations of 30 ng/ml resulted in a 65% reduction in the minimum alveolar concentration of enflurane,<sup>21</sup>

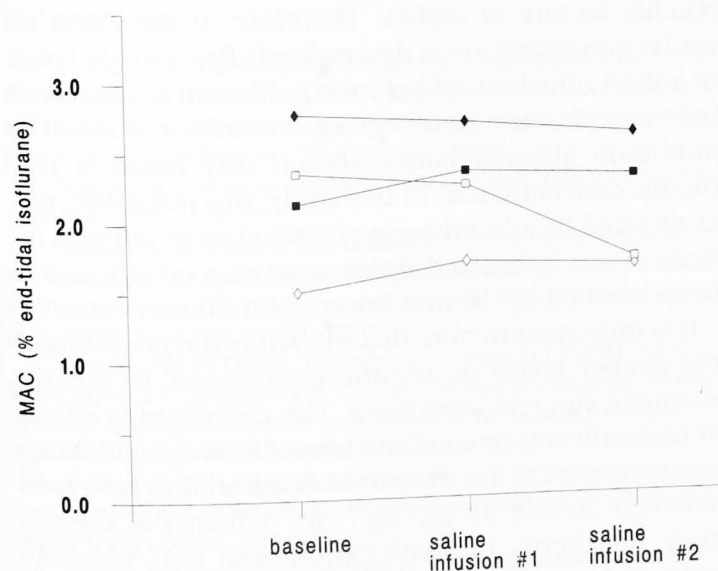

**Fig. 1.** The MAC<sub>ISO</sub> for control pigs (n = 4) during baseline and after two 60-min infusions of saline.

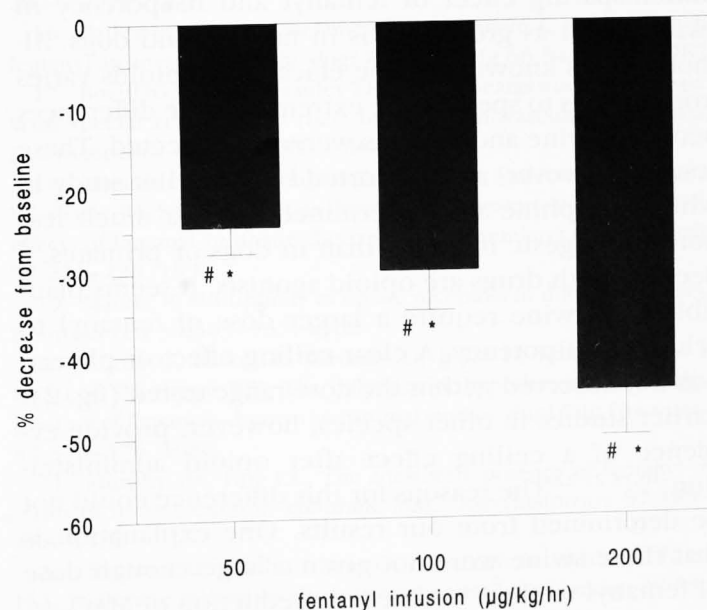

**Fig. 2.** The percent difference between baseline MAC<sub>ISO</sub> and MAC<sub>ISO</sub> after 60-min fentanyl infusions in swine (mean ± SEM, n = 8 for each group). All infusions resulted in a significant decrease in MAC<sub>ISO</sub>\* from baseline and significant differences were found among all infusions# ( $P \leq 0.01$ ).



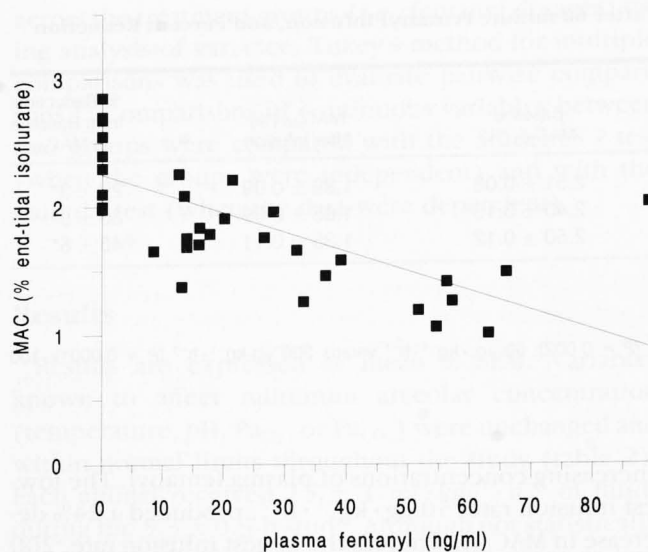

Fig. 3. Individual  $MAC_{ISO}$  values obtained at individual plasma fentanyl concentrations for all pigs receiving fentanyl. Zero plasma fentanyl concentrations correspond to the baseline  $MAC_{ISO}$  determinations for these pigs. Regression equation was  $y = 2.0 - 0.01x$ ,  $r^2 = -0.59$ , and was statistically significant ( $P \leq 0.01$ ).

but in the current study, 26 ng/ml plasma fentanyl concentration resulted in only a 30% reduction in  $MAC_{ISO}$ . It appears that the minimum alveolar concentration-sparing effect of fentanyl and its potency in swine is not as great as it is in humans and dogs. Although it is known that the efficacy of opioids varies from species to species, the extremely large differences between swine and humans were not expected. These results, however, are supported by an earlier study in which morphine was determined to be a much less potent analgesic in swine than in dogs or primates.<sup>15</sup> Because both drugs are opioid agonists, it seems plausible that swine require a larger dose of fentanyl to achieve equipotency. A clear ceiling effect or plateau was not observed within the dose range tested (fig. 2). Earlier studies in other species, however, provide evidence of a ceiling effect after opioid administration.<sup>16,18,21,22</sup> The reasons for this difference could not be determined from our results. One explanation is that these swine were not given a large enough dose of fentanyl to show a plateau in reduction of  $MAC_{ISO}$ .

The reason for the smaller reduction of  $MAC_{ISO}$  compared to other studies is unclear. Differences in acid-base status, temperature, carbon dioxide, electrolytes, and hemodynamics can affect minimum alveolar con-

centration, but these variables remained within normal range during our study and in the other comparative studies. Minimum alveolar concentration also may vary depending on differences in application of the supra-maximal stimulus (e.g., duration, moving the leg or not), evaluation of responses to the stimuli, or the type of inhalant anesthetic being tested. However, it seems unlikely that minor differences in these factors would account for the large differences observed between species. Species differences in opioid receptor type, number or distribution may account for some of the differences observed.<sup>19,30</sup> Although minimal data are available, fentanyl and morphine appear to have different pharmacokinetics in swine than in dogs and, potentially, other species.<sup>15,20,31</sup>

Another potential cause for differences in the reduction of  $MAC_{ISO}$  compared to other studies is that our swine may have developed acute tolerance to the fentanyl. Tolerance after a continuous infusion or multiple intermittent boluses has been reported as a potential reason for differences in studies evaluating the anesthetic and analgesic effects of fentanyl in dogs.<sup>16,32</sup> Evidence of acute tolerance was not apparent in this study, however, because the same decrease in  $MAC_{ISO}$  was found for comparable plasma fentanyl concentrations, regardless whether that level was attained during the first or second infusion.

One further explanation for study differences may be the apparent hysteresis that has been reported to occur between plasma fentanyl concentration and its physiologic effects.<sup>22</sup> That is, there is a lag before fentanyl reaches its site of action. Therefore, if minimum alveolar concentration is determined after a single bolus or a short infusion and before equilibrium has occurred between plasma and receptors, a smaller reduction in minimum alveolar concentration may result at that plasma concentration. In this study, this possibility was eliminated by administering fentanyl as an infusion instead of as a bolus, and steady-state concentrations had been reached by 30 min into the 60-min infusion.

It is important to note that this study did not evaluate the deeper levels of anesthesia necessary to provide adequate surgical anesthesia. The contributing effects of premedicants or combinations of fentanyl with other anesthetics were not examined. Some studies have used between 20 and 50  $\mu\text{g} \cdot \text{kg}^{-1} \cdot \text{h}^{-1}$  fentanyl as the primary anesthetic, in combination with only premedicants and paralysis.<sup>1,3</sup> Our data show, however, that a fentanyl infusion of 50  $\mu\text{g} \cdot \text{kg}^{-1} \cdot \text{h}^{-1}$  is not adequate as

a sole anesthetic in swine by only 25%. Furthermore, reduces  $MAC_{ISO}$  an average the dosages tested in this produce acceptable, comp equate anesthesia may be combined with other anest be used according to pharm not based on human dosag

In conclusion, results from that fentanyl infusions of 5 the minimum alveolar co swine but not to the same other species. Therefore, used in research involving carefully by the investigat to the animal and to prevent Protocols should be design dosages up to 200  $\mu\text{g} \cdot \text{kg}^{-1} \cdot \text{h}^{-1}$  approximately a 50%  $MAC_{ISO}$  taken when applying ane for humans to other spec

The authors acknowledge the anesthetic Laboratory and Dr. The results, and Dr. Tim Wachs, for tration assays. The authors also expertise; Denise Hine, for sec VMTM chief pharmacist, for drug

## References

- Swindle MM, Hornsaffer PJ, RS, Baumgartner WA, Berkson A and anesthetic considerations in surgery in swine. *Lab Anim Sci* 36:348-350, 1986
- Hughes HC: Swine in cardiology. *Lab Anim Sci* 36:348-350, 1986
- Nagano K, Gelman S, Park and oxygen supply-uptake relation during anesthesia with volatile agents. *Anesth Analg* 70:554-562, 1990
- Van Woerkens ECSM, Tron MG, Boomsa F, Verdouw PD: dynamics during isovolemic hypotension. *Am J Physiol* 72:760-769, 1997
- Gelman S, Dillard E, Bra surgical stress and anesthesia w. *Anesth Analg* 66:936-943, 1987
- Stränge K, Lagerkranser M: potentiation and cerebrovascula pig. *Anesth Analg* 73:745-752, 1991

## MAC-SPARING EFFECTS OF FENTANYL IN SWINE

a sole anesthetic in swine because it reduces  $MAC_{ISO}$  by only 25%. Furthermore, fentanyl at  $200 \mu\text{g} \cdot \text{kg}^{-1} \cdot \text{h}^{-1}$  reduces  $MAC_{ISO}$  an average of 45%. Therefore, none of the dosages tested in this study should be expected to produce acceptable, complete anesthesia in swine. Adequate anesthesia may be obtained when fentanyl is combined with other anesthetics, but other drugs must be used according to pharmacologic data for swine and not based on human dosages.

In conclusion, results from the current study indicate that fentanyl infusions of  $50\text{--}200 \mu\text{g} \cdot \text{kg}^{-1} \cdot \text{h}^{-1}$  reduce the minimum alveolar concentration of isoflurane in swine but not to the same degree as has been found in other species. Therefore, fentanyl dosages currently used in research involving swine should be evaluated carefully by the investigator to ensure minimal distress to the animal and to prevent collecting misleading data. Protocols should be designed with the knowledge that dosages up to  $200 \mu\text{g} \cdot \text{kg}^{-1} \cdot \text{h}^{-1}$  contribute approximately a 50% MAC equivalent. Extreme care should be taken when applying anesthetic protocols developed for humans to other species, such as swine.

The authors acknowledge the patience and persistence of the Diagnostic Laboratory and Dr. Thomas Reimers, for the blood fentanyl results, and Dr. Tim Wachs, for mass spectrometric fentanyl concentration assays. The authors also thank Jeanne Brohart, for technical expertise; Denise Hine, for secretarial assistance; and Jerry Decker, VMTH chief pharmacist, for drug preparation throughout this project.

## References

- Swindle MM, Horneffer PJ, Gardner TJ, Gott VL, Hall TS, Stuart RS, Baumgartner WA, Borkon AM, Galloway E, Reitz BA: Anatomic and anesthetic considerations in experimental cardiopulmonary surgery in swine. *Lab Anim Sci* 36:357-361, 1986
- Hughes HC: Swine in cardiovascular research. *Lab Anim Sci* 36:348-350, 1986
- Nagano K, Gelman S, Parks D, Bradley EL Jr: Hepatic circulation and oxygen supply-uptake relationships after hepatic ischemic insult during anesthesia with volatile anesthetics and fentanyl in miniature pigs. *Anesth Analg* 70:53-62, 1990
- Van Woerkens ECSM, Trouwborst A, Duncker DJGM, Koning MMG, Boomsa F, Verdouw PD: Catecholamines and regional hemodynamics during isovolemic hemodilution in anesthetized pigs. *J Appl Physiol* 72:760-769, 1992
- Gelman S, Dillard E, Bradley EL: Hepatic circulation during surgical stress and anesthesia with halothane, isoflurane, or fentanyl. *Anesth Analg* 66:936-943, 1987
- Stränge K, Lagerkranser M, Sollevi A: Nitroprusside-induced hypotension and cerebrovascular autoregulation in the anesthetized pig. *Anesth Analg* 73:745-752, 1991
- Fourie PR, Coetzee AR, Bolliger CT: Pulmonary artery compliance: Its role in right ventricular-arterial coupling. *Cardiovasc Res* 26:839-844, 1992
- Coetzee A, Fourie P, Bolliger C, Badenhorst E, Rebel A, Lombard C: Effect of  $\text{N}_2\text{O}$  on segmental left ventricular function and effective arterial elastance in pigs when added to a halothane-fentanyl-pancuronium anesthetic technique. *Anesth Analg* 69:313-322, 1989
- Brutel de la Rivière A, Quaegebeur JM, Hennis PJ, Brutel de la Rivière G, Huysmans HA, Brom AG: Growth of an aorto-coronary anastomosis. *J Thorac Cardiovasc Surg* 86:393-399, 1983
- Ehler WJ, Mack JW, Brown DL, Davis RF: Avoidance of malignant hyperthermia in a porcine model for experimental open heart surgery. *Lab Anim Sci* 35:172-174, 1985
- de Lange JJ, Hoitsma HFW, Meijer S: Anesthetic management in experimental orthotopic liver transplantation in the pig. *Eur Surg Res* 16:360-365, 1984
- Pittet J-F, Tassonyi E, Schopfer C, Morel DR, Mentha G, Fathi M, Le Coultre C, Steinig DA, Benakis A: Plasma concentrations of laudanosine, but not atracurium, are increased during the anhepatic phase of orthotopic liver transplantation in pigs. *ANESTHESIOLOGY* 72:145-152, 1990
- Blankensteijn JD, Schlejen PM, Groenland THN, Terpstra OT: The effects of long-term graft preservation and prostaglandin E1 on intraoperative hemodynamic changes in liver transplantation. *Transplantation* 54:423-428, 1992
- Hall TS, Borkon AM, Baumgartner WA, Smart RS, Swindle MM, Galloway E, Reitz A: Use of swine in heart transplantation research. *Swine in Biomedical Research*. Edited by Tumbleson ME. New York, Plenum, 1986, pp 373-376
- Steffey EP, Baggot JD, Eisele JH, Willits N, Woliner MJ, Jarvis KA, Elliott AR, Tagawa M: Morphine-isoflurane interaction in dogs, miniature swine, and Rhesus monkeys. *J Vet Pharmacol Ther* 17:202-210, 1994
- Bailey PL, Port JD, McJames S, Reinersman L, Stanley TH: Is fentanyl an anesthetic in the dog? *Anesth Analg* 66:542-548, 1987
- Bovill JG, Sebel PS, Stanley TH: Opioid analgesics in anesthesia: With special reference to their use in cardiovascular anesthesia. *ANESTHESIOLOGY* 61:731-755, 1984
- Nussmeier NA, Benthuyesen JL, Steffey EP, Anderson JH, Carstens EE, Eisele JH, Stanley TH: Cardiovascular, respiratory and analgesic effects of fentanyl in unanesthetized rhesus monkeys. *Anesth Analg* 72:221-226, 1991
- Maurer R: Multiplicity of opiate receptors in different species. *Neurosci Lett* 30:303-307, 1982
- Koren G, Barker C, Goresky G, Bohn D, Kent G, Klein J, MacLeod SM, Biggar WD: The influence of hypothermia on the disposition of fentanyl—human and animal studies. *Eur J Clin Pharmacol* 32:373-376, 1987
- Murphy MR, Hug CC: The anesthetic potency of fentanyl in terms of its reduction of enflurane MAC. *ANESTHESIOLOGY* 57:485-488, 1982
- McEwan AI, Smith C, Dyar O, Goodman D, Smith LR, Glass PSA: Isoflurane minimum alveolar concentration reduction by fentanyl. *ANESTHESIOLOGY* 78:864-869, 1993
- Quasha AL, Eger EL, Tincker JH: Determinations and applications of MAC. *ANESTHESIOLOGY* 53:315-334, 1980
- Lundeen G, Manohar M, Parks C: Systemic distribution of blood flow in swine while awake and during 1.0 and 1.5 MAC isoflurane

anesthesia with or without 50% nitrous oxide. *Anesth Analg* 62:499-512, 1983

25. Neter J, Wasserman W, Kutner MH: *Applied Linear Statistical Models*. Homewood, Richard D. Irwin, 1990, pp 920-924

26. SAS Institute Inc: *SAS User's Guide: Statistics*. Version 5 Edition. Cary, SAS Institute, 1985, p 433

27. Bailar JC, Mosteller F: *Medical Uses of Statistics*. Waltham: New England Journal Medical Books, 1986, pp 207-219

28. Snedecor GW, Cochran WG: *Statistical Methods*. Ames, Iowa State University, 1989, pp 89

29. Eger EI, Johnson BM, Weiskopf RB, Holmes MA, Yasuda N,

Targ A, Rampil IJ: Minimum alveolar concentration of 1-653 and isoflurane to pigs: Definition of a supramaximal stimulus. *Anesth Analg* 67:1174-1176, 1988

30. Robson LE, Gillan MGC, Kosterlitz HW: Species differences in the concentrations and distributions of opioid binding sites. *Eur J Pharmacol* 112:65-71, 1985

31. Murphy MR, Hug CC, McClain DA: Dose-independent pharmacokinetics of fentanyl. *ANESTHESIOLOGY* 59:537-540, 1983

32. Askitopoulou H, Whitwam JG, Al-Khudhairi D, Chakrabarti M, Bower S, Hull CJ: Acute tolerance to fentanyl during anesthesia in dogs. *ANESTHESIOLOGY* 63:255-261, 1985

## Opioid Agonist Neurotransmission

Lucia Zappi, M.D.,\* Francesc

**Background:** Stimulation of  $\alpha_1$  receptors can modulate cholinergic neurotransmission and induce bronchoconstriction. The present study was designed to evaluate the effect of halothane against bronchoconstriction induced by the inhalation of opioids as a method to protect against bronchoconstriction in an opioid concentration-dependent model. It may be insufficient when opioids are used in clinical techniques. In addition, new techniques have been developed that could more selectively block bronchoconstriction.

**Methods:** The effect of three different concentrations of opioids on the contractile response to electrical stimulation of the guinea pig trachea (upper, middle, or lower, or carinal).

**Results:** The selective  $\alpha_1$  agonist, N-(2-1-pyrrolidinyl) cyclohexanecarboxamide hydrochloride (DAMGO) and the selective  $\mu$ -opioid receptor agonist, [D-Ala<sup>1</sup>] enkephalin (DAMGO) reduced the contractile response to electrical stimulation ( $P < 0.001$ , respectively) in a concentration-dependent manner. At low stimulating frequencies, the contractile response to electrical stimulation was not significantly altered ( $P < 0.01$ ). The selective  $\delta$ -opioid receptor agonist, [D-Pen<sup>1</sup>] enkephalin (D-PEN) did not alter the contractile response to electrical stimulation. Significant differences among the responses to the selective  $\alpha_1$  agonist, DAMGO ( $P = 0.50$ ) and DAMGO ( $P = 0.44$ ) were observed. The selective  $\mu$ -opioid receptor agonist, DAMGO ( $P > 0.21$ , respectively), suggested a prejunctional effect. The a

\* Associate Consultant

† Professor, Department of Anesthesiology

‡ Emeritus Professor of Anesthesiology, Rochester, Minnesota.

Received from the Servizio di Anestesiologia, Istituto Nazionale per la Ricerca sul Cancro, Milan, Italy.

publication January 23, 1995.

1995. Presented in part at the meeting of the American Society of Anesthesiologists, Boston, Massachusetts, October 1994.

Company, Kalamazoo, Michigan.

Address reprint requests to Dr. Lucia Zappi, Istituto Nazionale per la Ricerca sul Cancro, Viale Benedetto XV, 2, I-20138 Milano, Italy.

Anesthesiology, V 83, No 3, Sep
